# Supplementary material
Source: PubMed Central journal article supplement (PMC3070192)

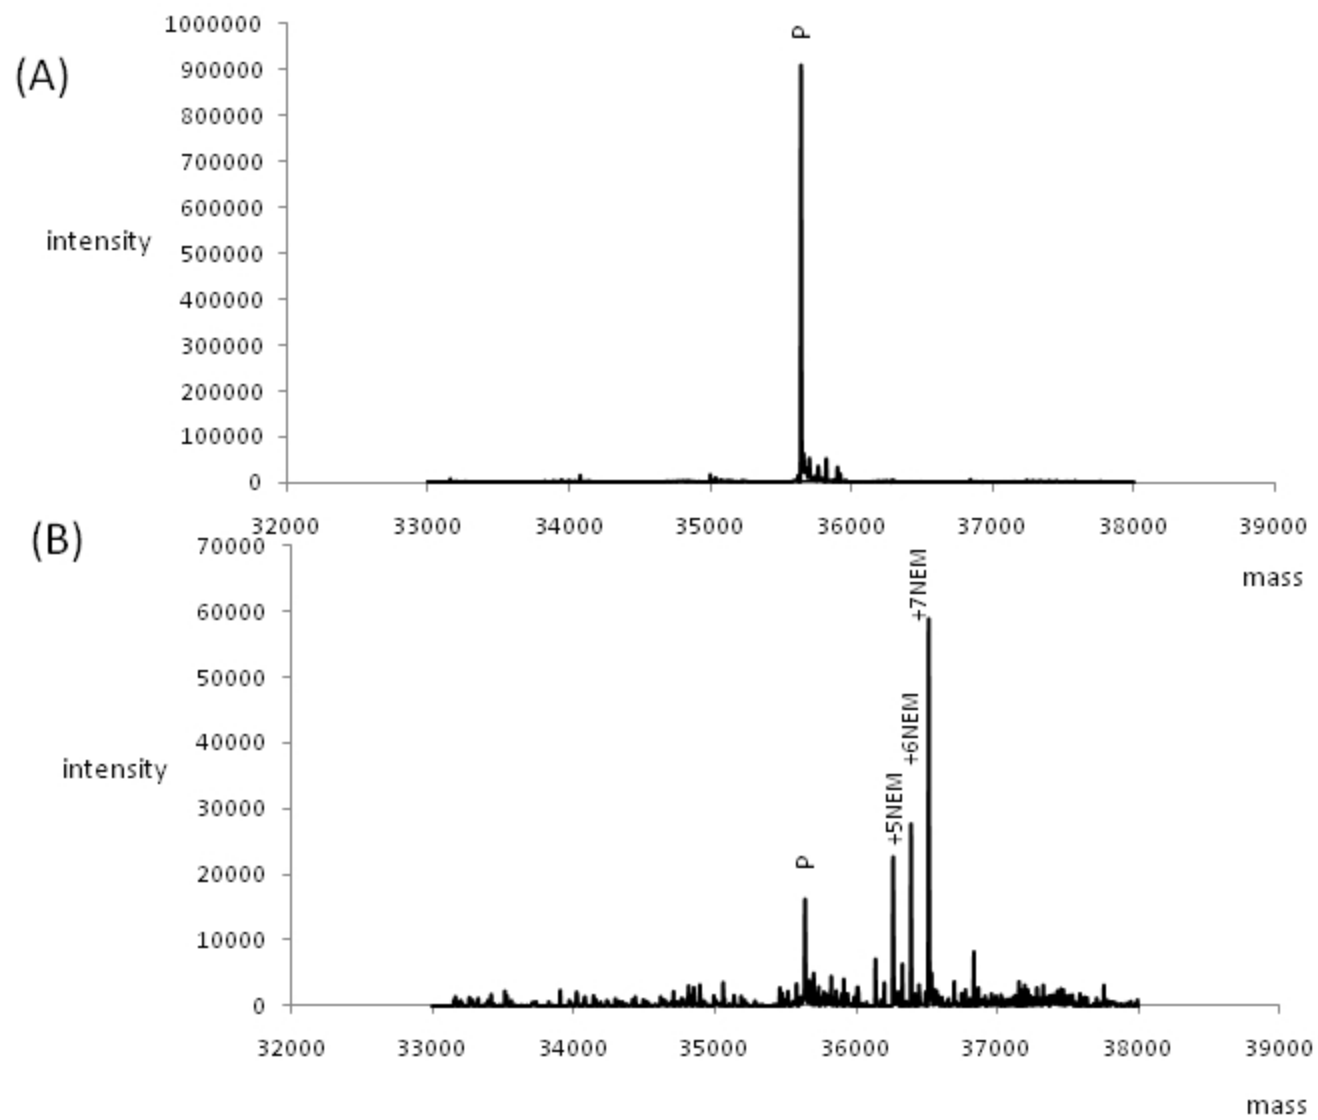

**Figure S1.**

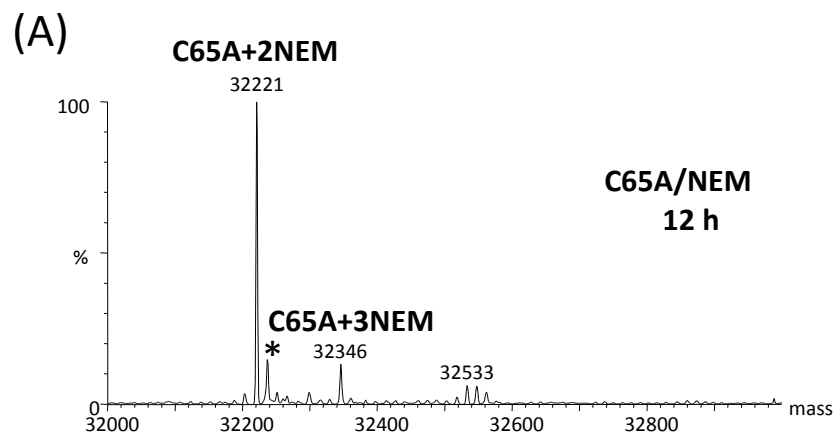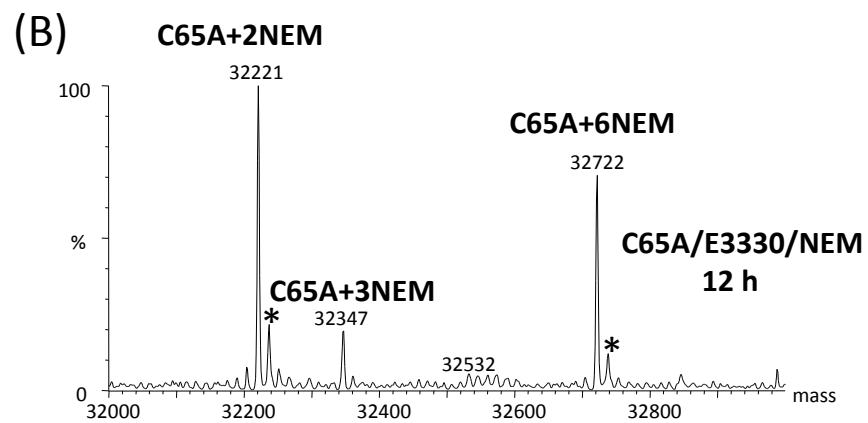

**Figure S2.**

(C)

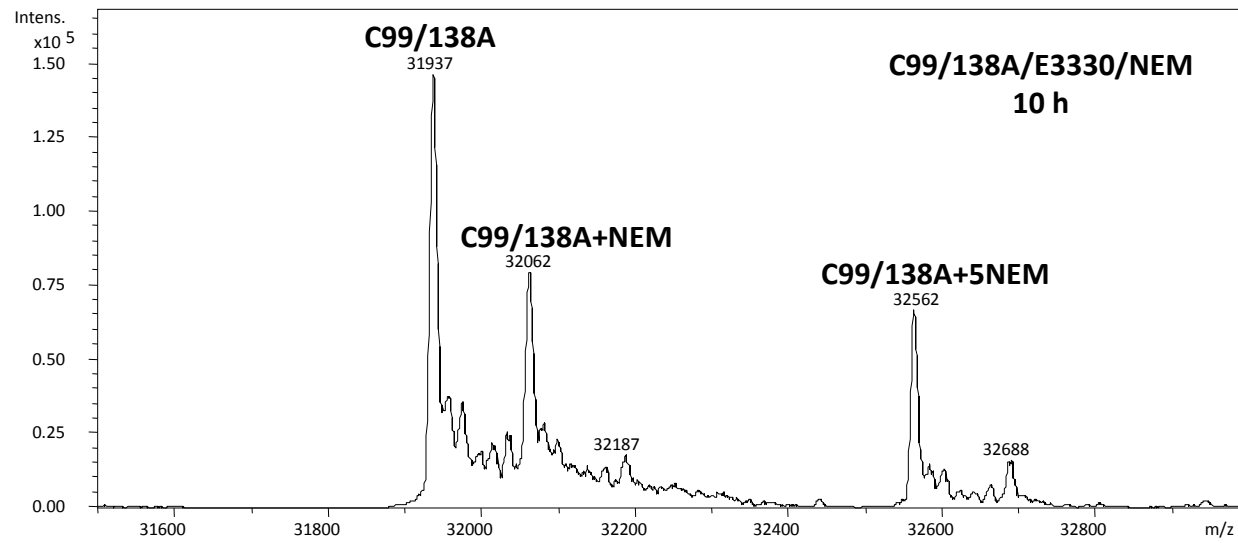

**Figure S2.**

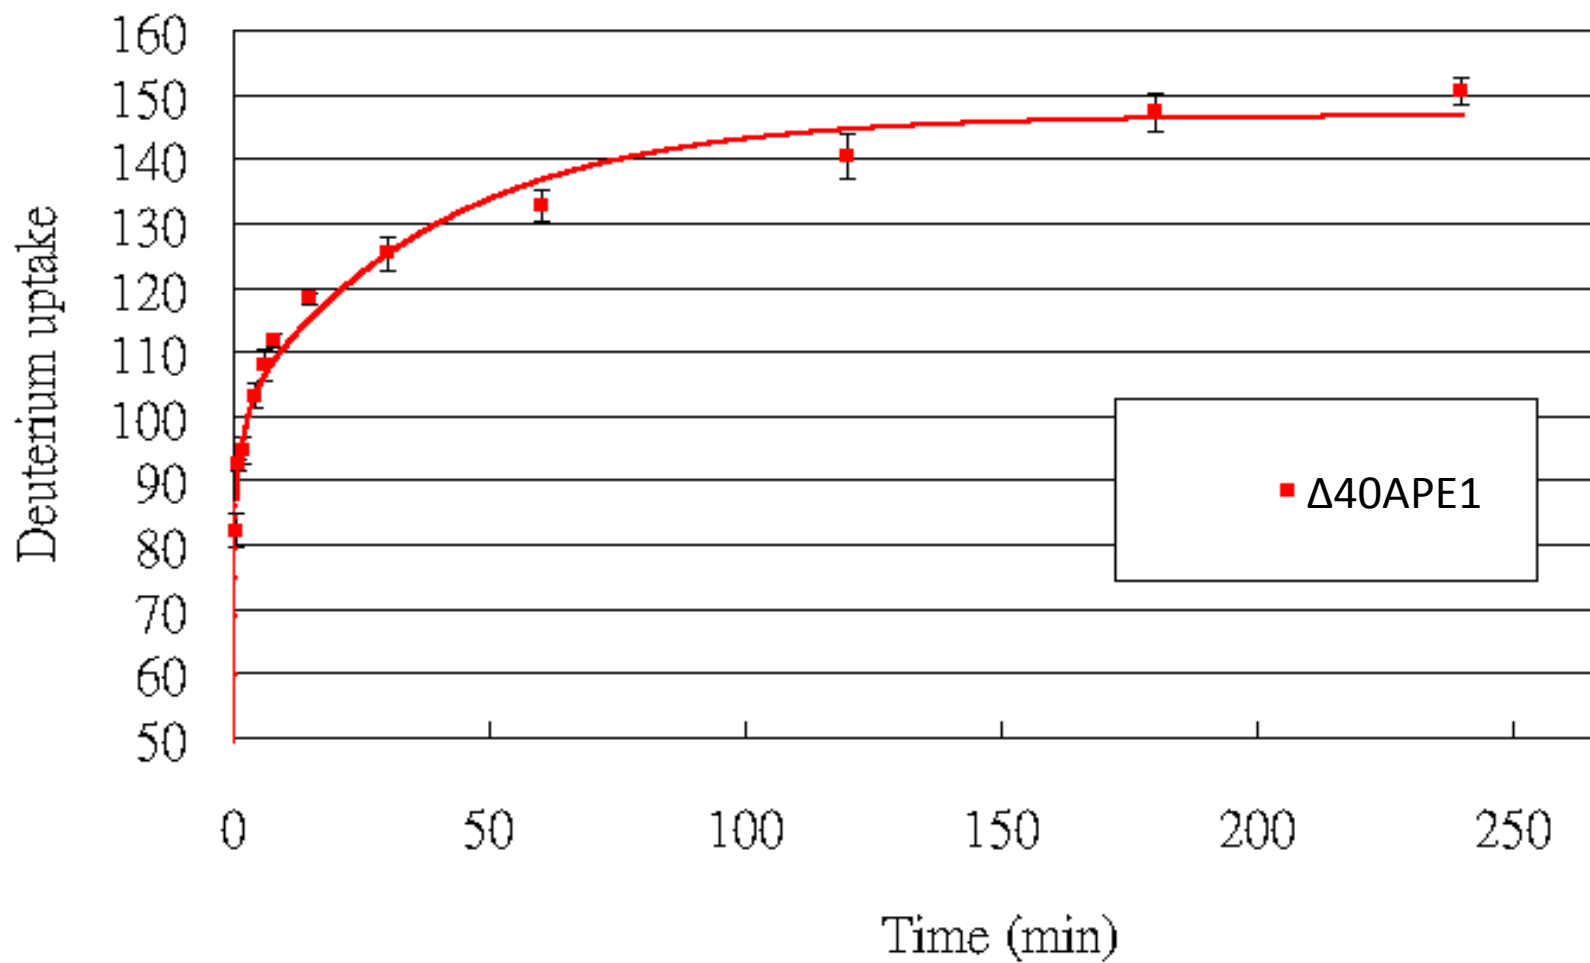

**Figure S3.**

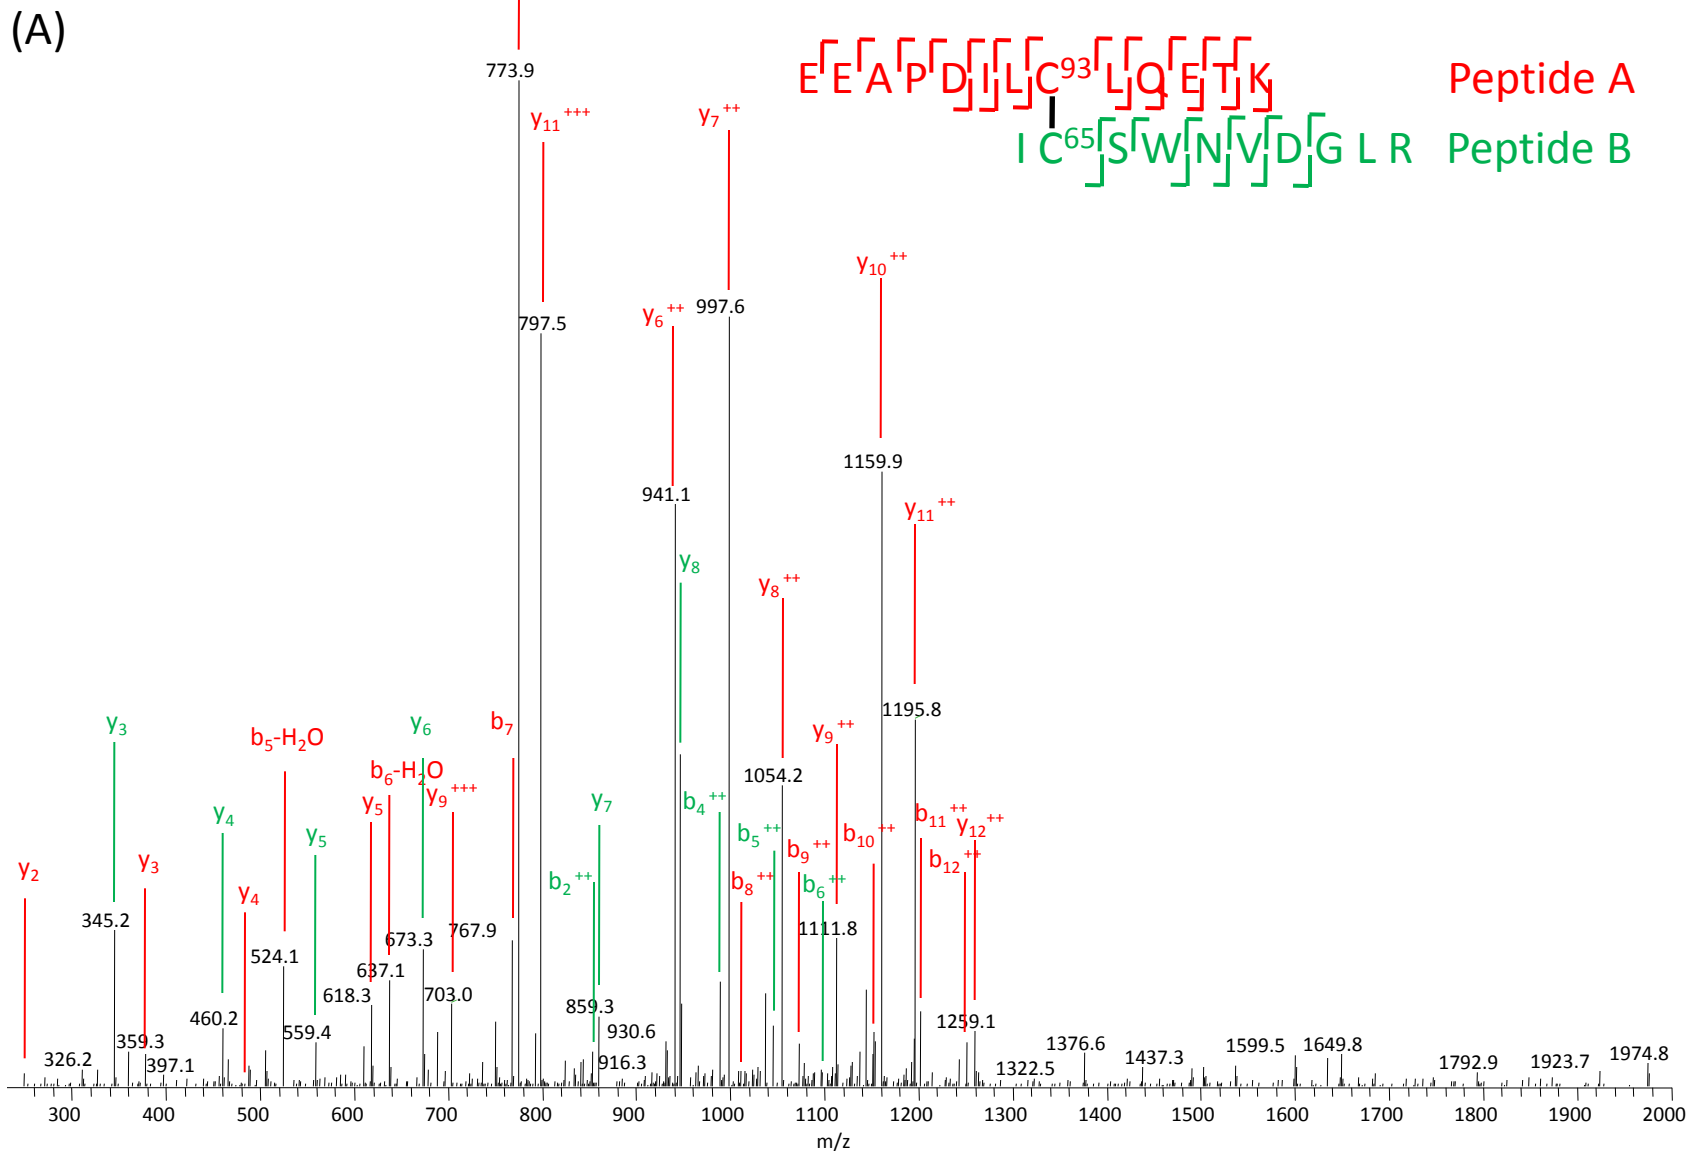

Figure S4.

(B)

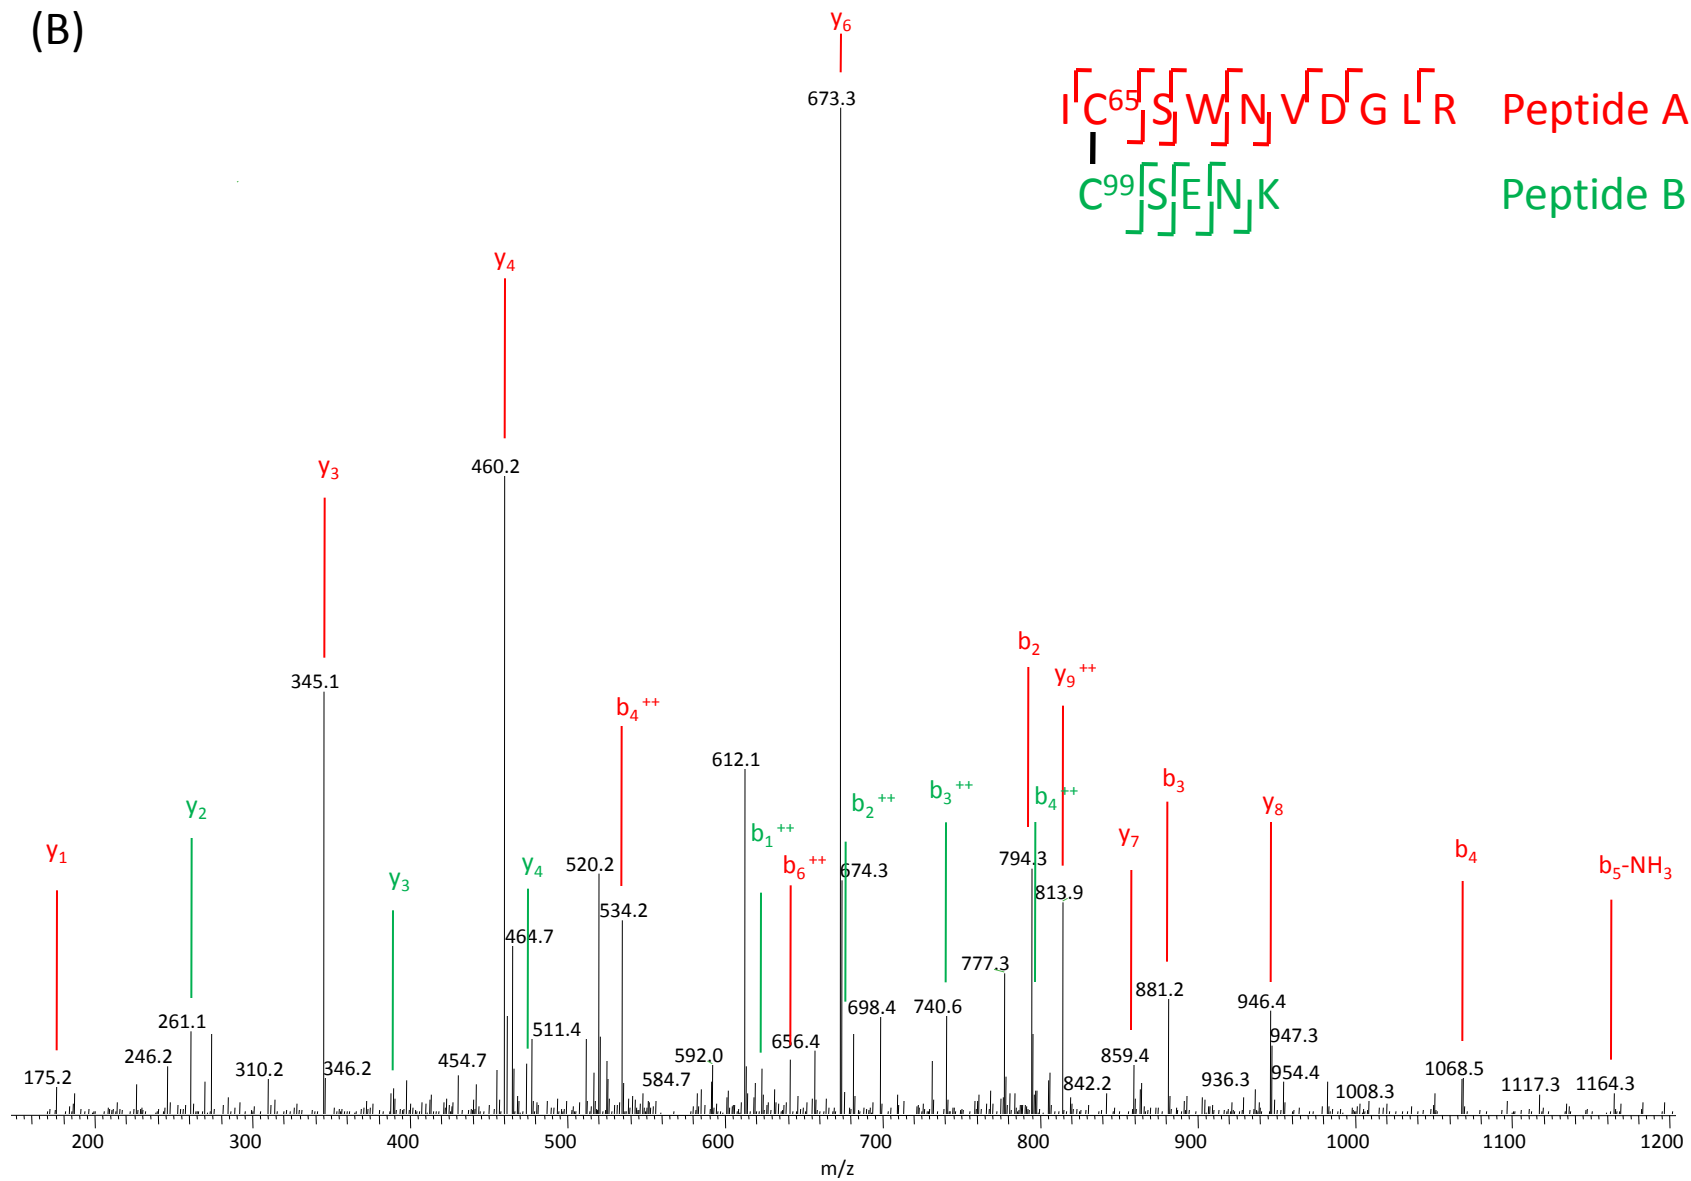

Figure S4.

(C)

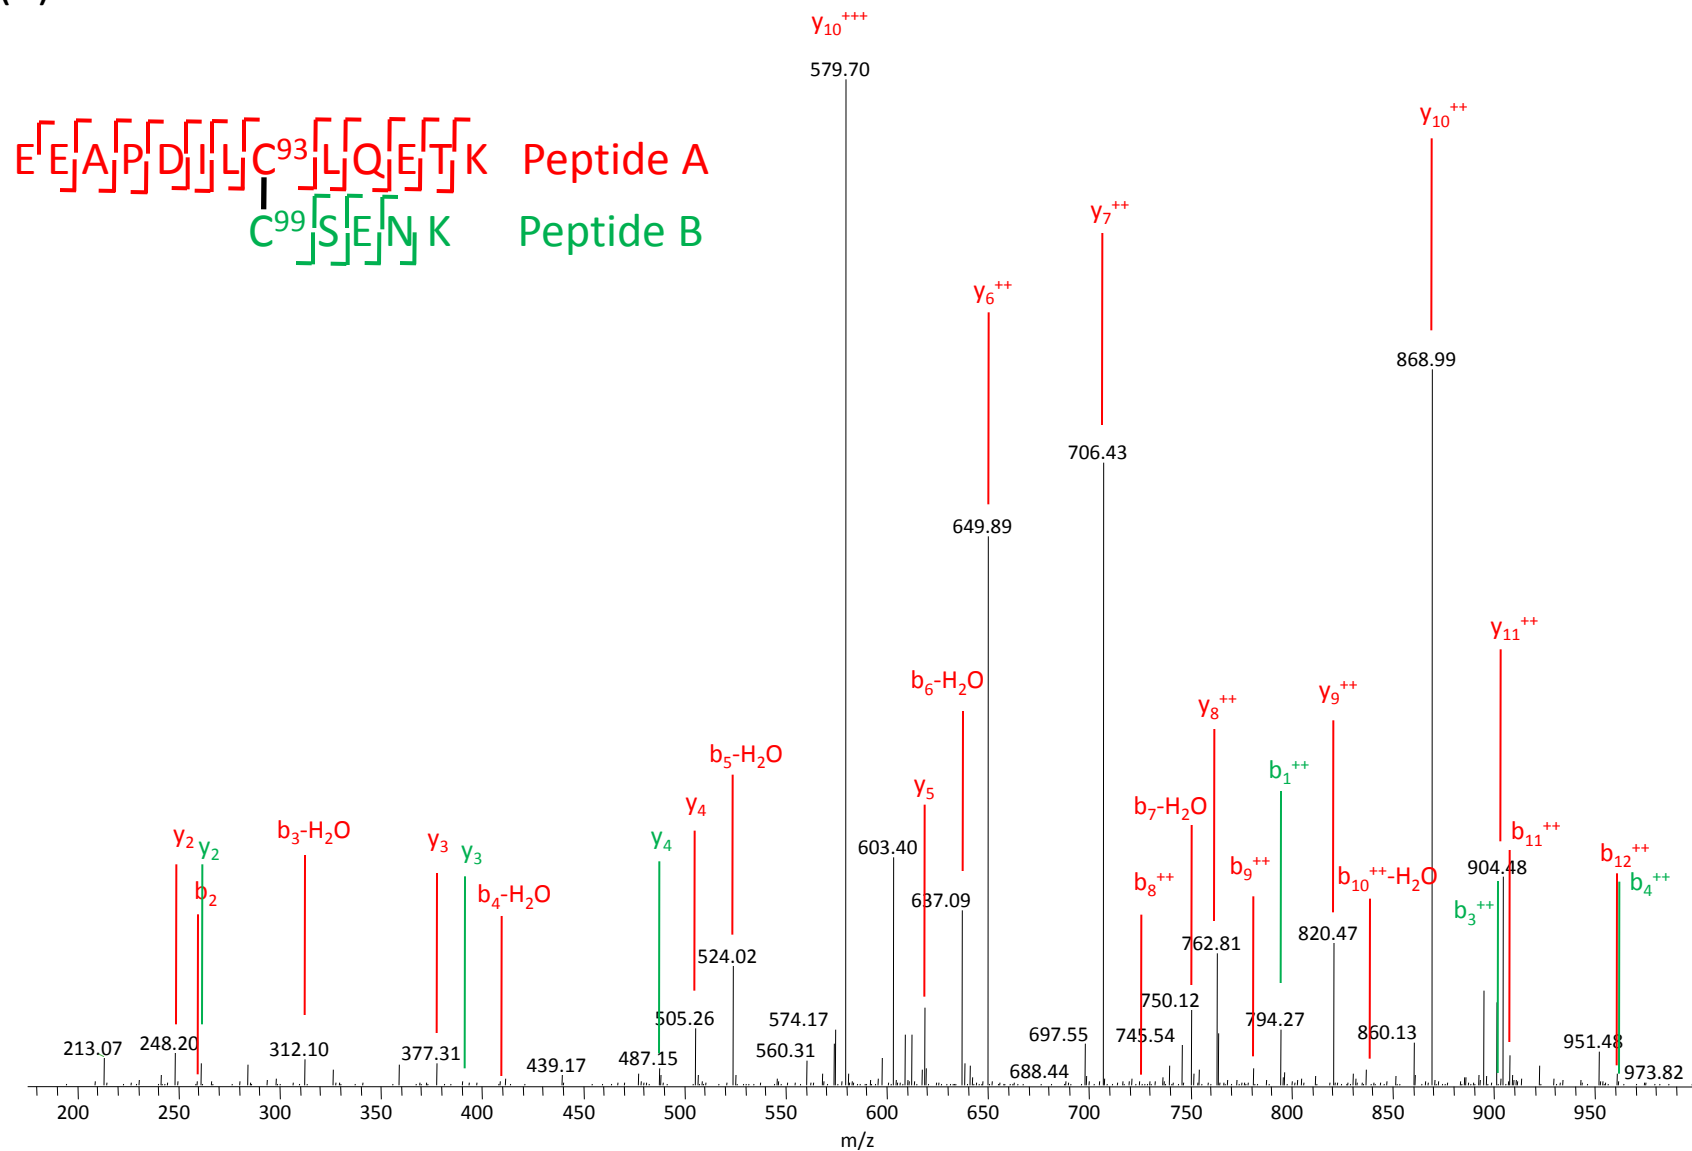

Figure S4.

(D)

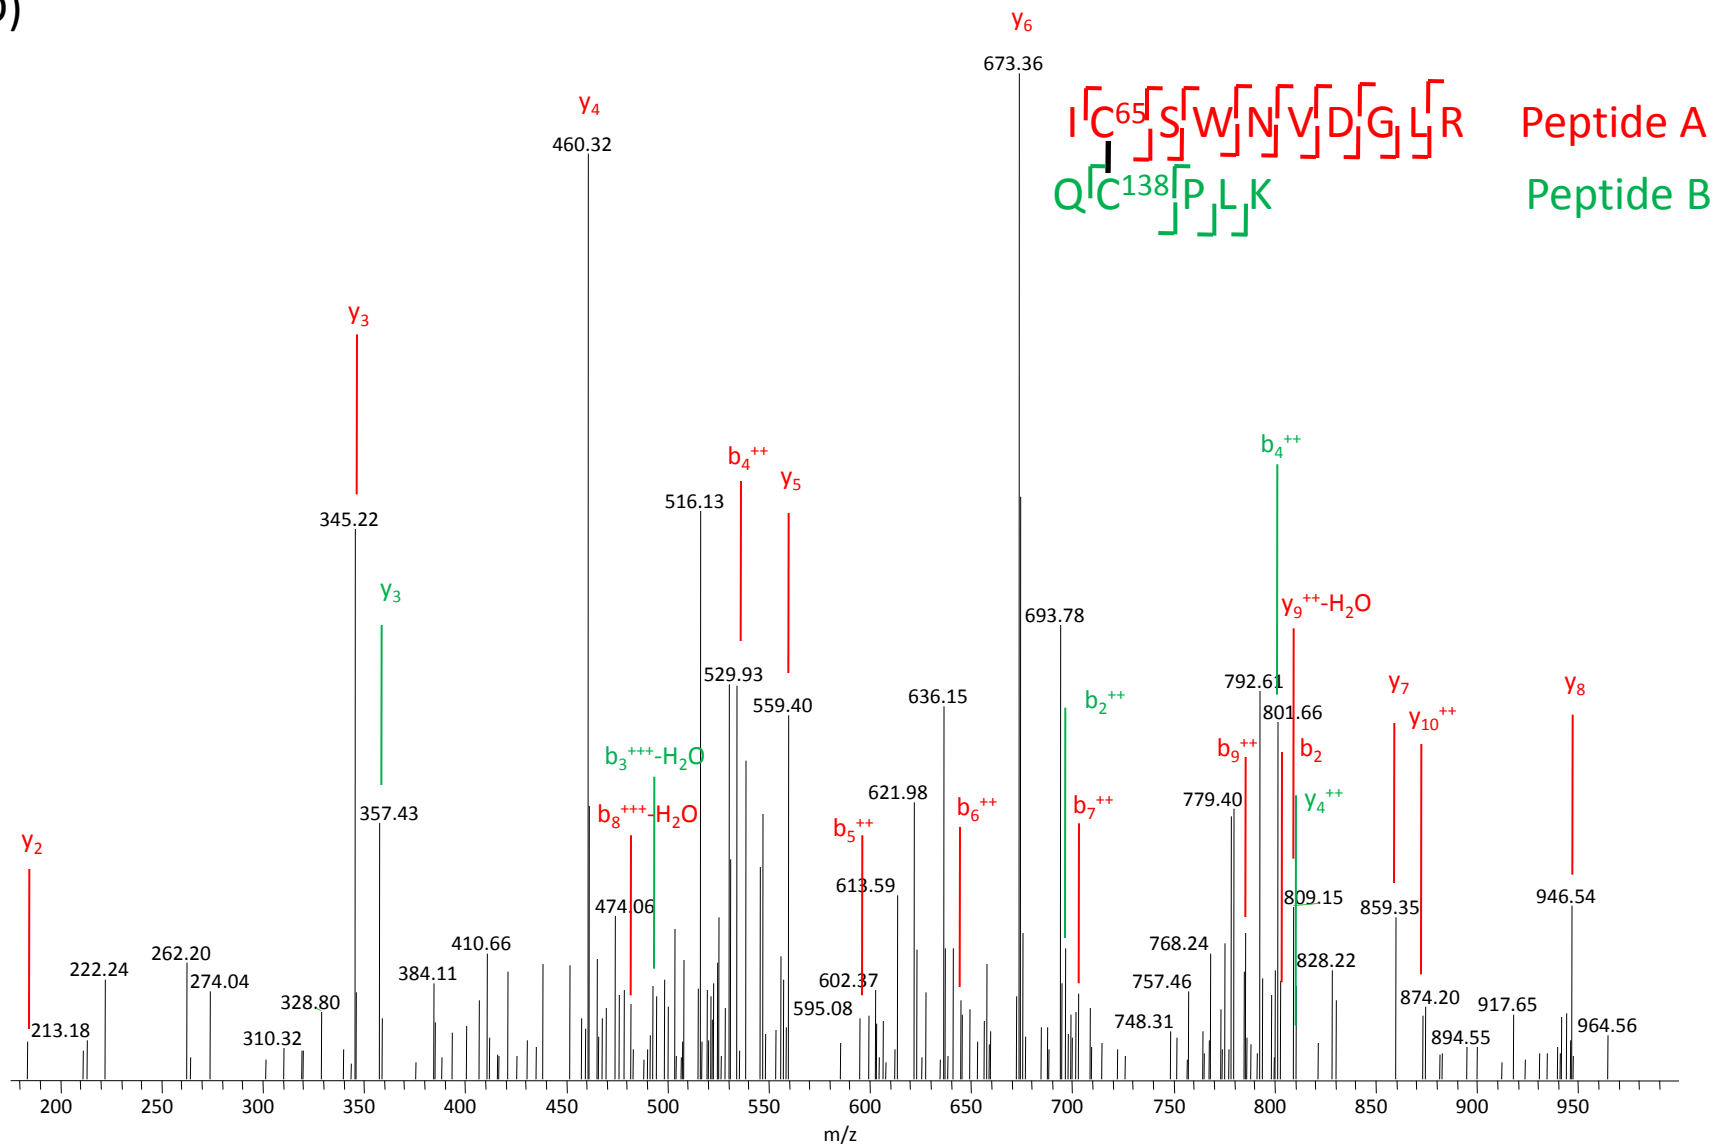

Figure S4.



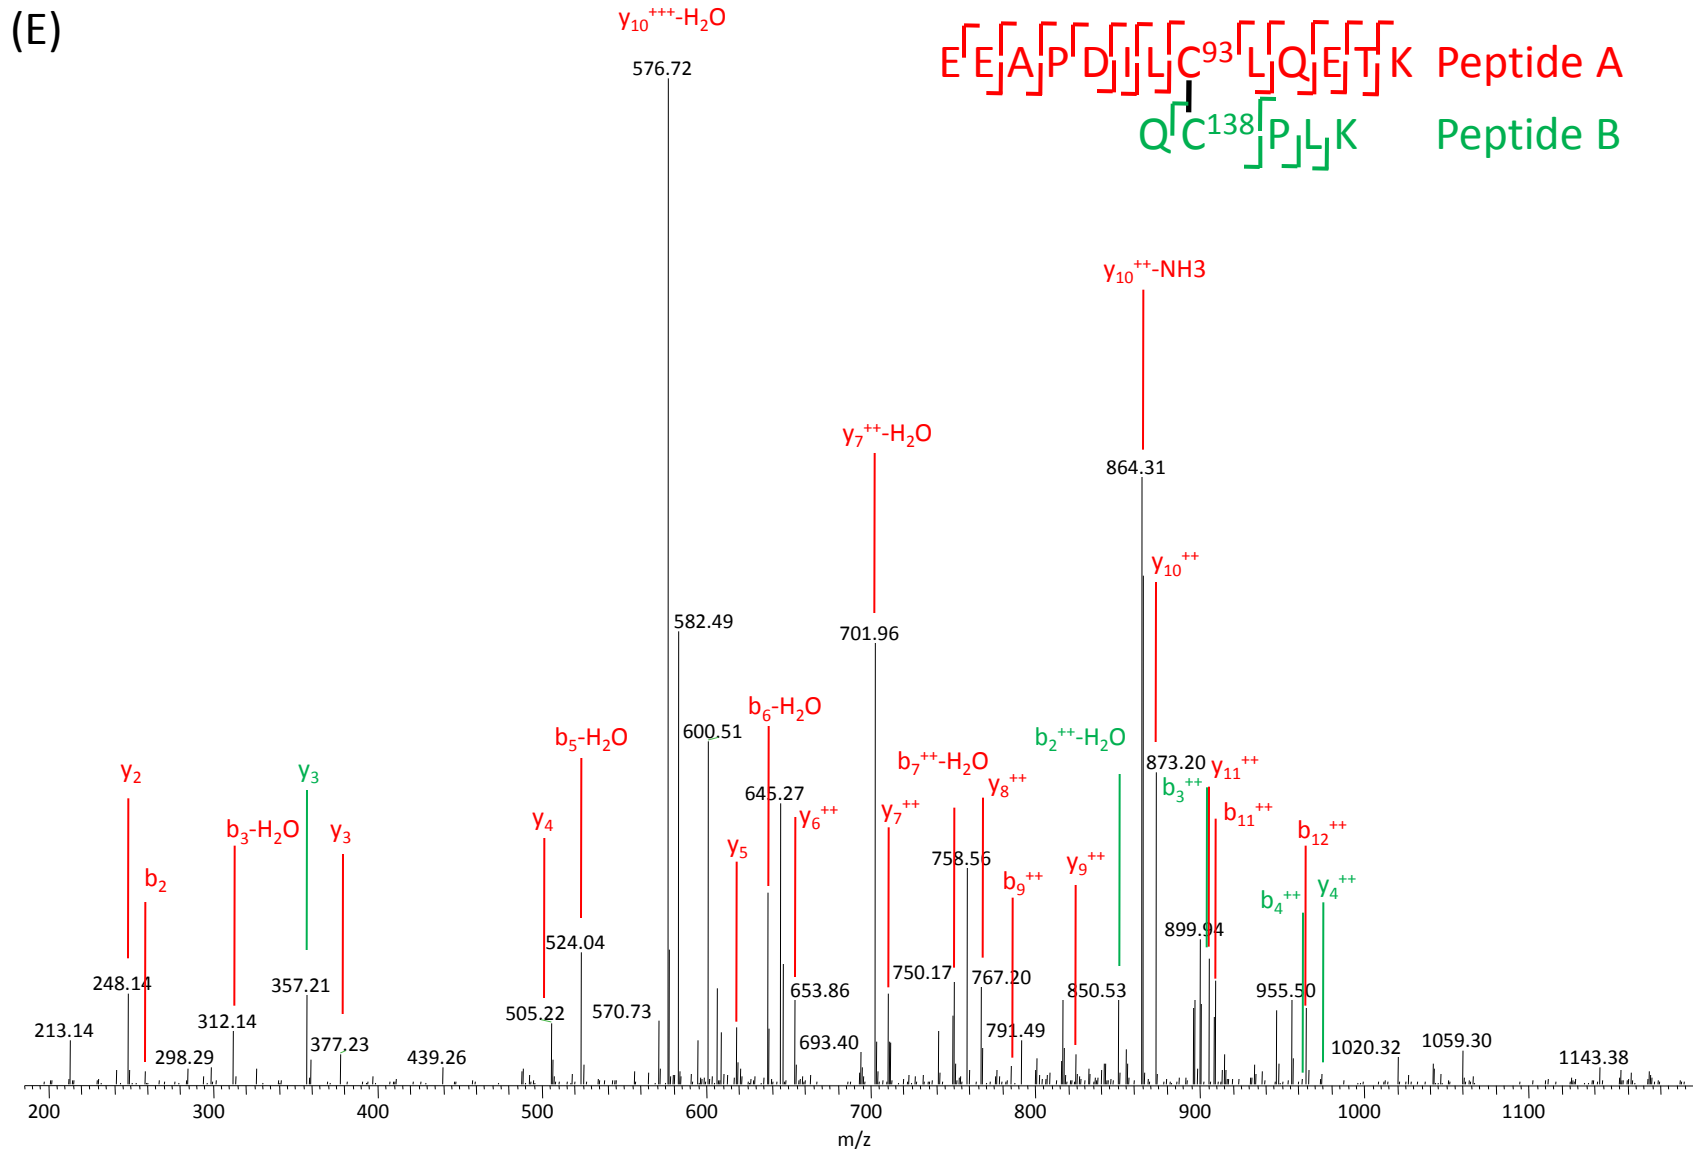

Figure S4.

Supplement: NIHMS257562-supplement-2_si_002.pdf [file NIHMS257562-supplement-2_si_002.pdf]
